# Supplementary material
Source: publisher figshare collection journal article supplement (https://springernature.figshare.com/ndownloader/files/17297501)
Supplement: Supplementary file 1 [file 17297501]

## Sheet: WOS search string and settings
Web of Science Search Terms	TS=(forest OR savanna OR woodland OR shrubland OR shrub-land OR shrub OR *scrub* OR hardwood OR deciduous OR broadlea* OR broad-lea* OR boreal OR mixed-wood OR mixedwood OR *succession* OR oak OR aspen OR willow OR maple OR beech OR birch OR alder OR poplar OR spruce OR fir OR pine OR hemlock OR red-cedar OR ash OR elm OR hickory OR "old-field" OR forestry) AND TS=(bird OR avian OR songbird OR wa…
Web of Science Limiters/Settings	LANGUAGE: (English) AND DOCUMENT TYPES: (Article OR Book OR Book Chapter OR Correction OR Correction, Addition OR Data Paper OR Early Access OR Note OR Proceedings Paper OR Retracted Publication OR Retraction OR Review) Indexes=SCI-EXPANDED Timespan= ALL years
